# Supplementary material for: The effects of handedness on sensorimotor rhythm desynchronization and motor-imagery BCI control
Source: Springer Nature journal article supplement (doi:10.1038/s41598-020-59222-w), 2020-02-07
Supplement: 41598_2020_59222_MOESM1_ESM.pdf [file 41598_2020_59222_MOESM1_ESM.pdf]

## The effects of handedness on sensorimotor rhythm desynchronization and motor-imagery BCI control

Dariusz Zapala, Emilia Zabielska-Mendyk, Pawel Augustynowicz, Andrzej Cudo, Marta Jaskiewicz, Marta Szewczyk, Natalia Kopiś, Piotr Francuz

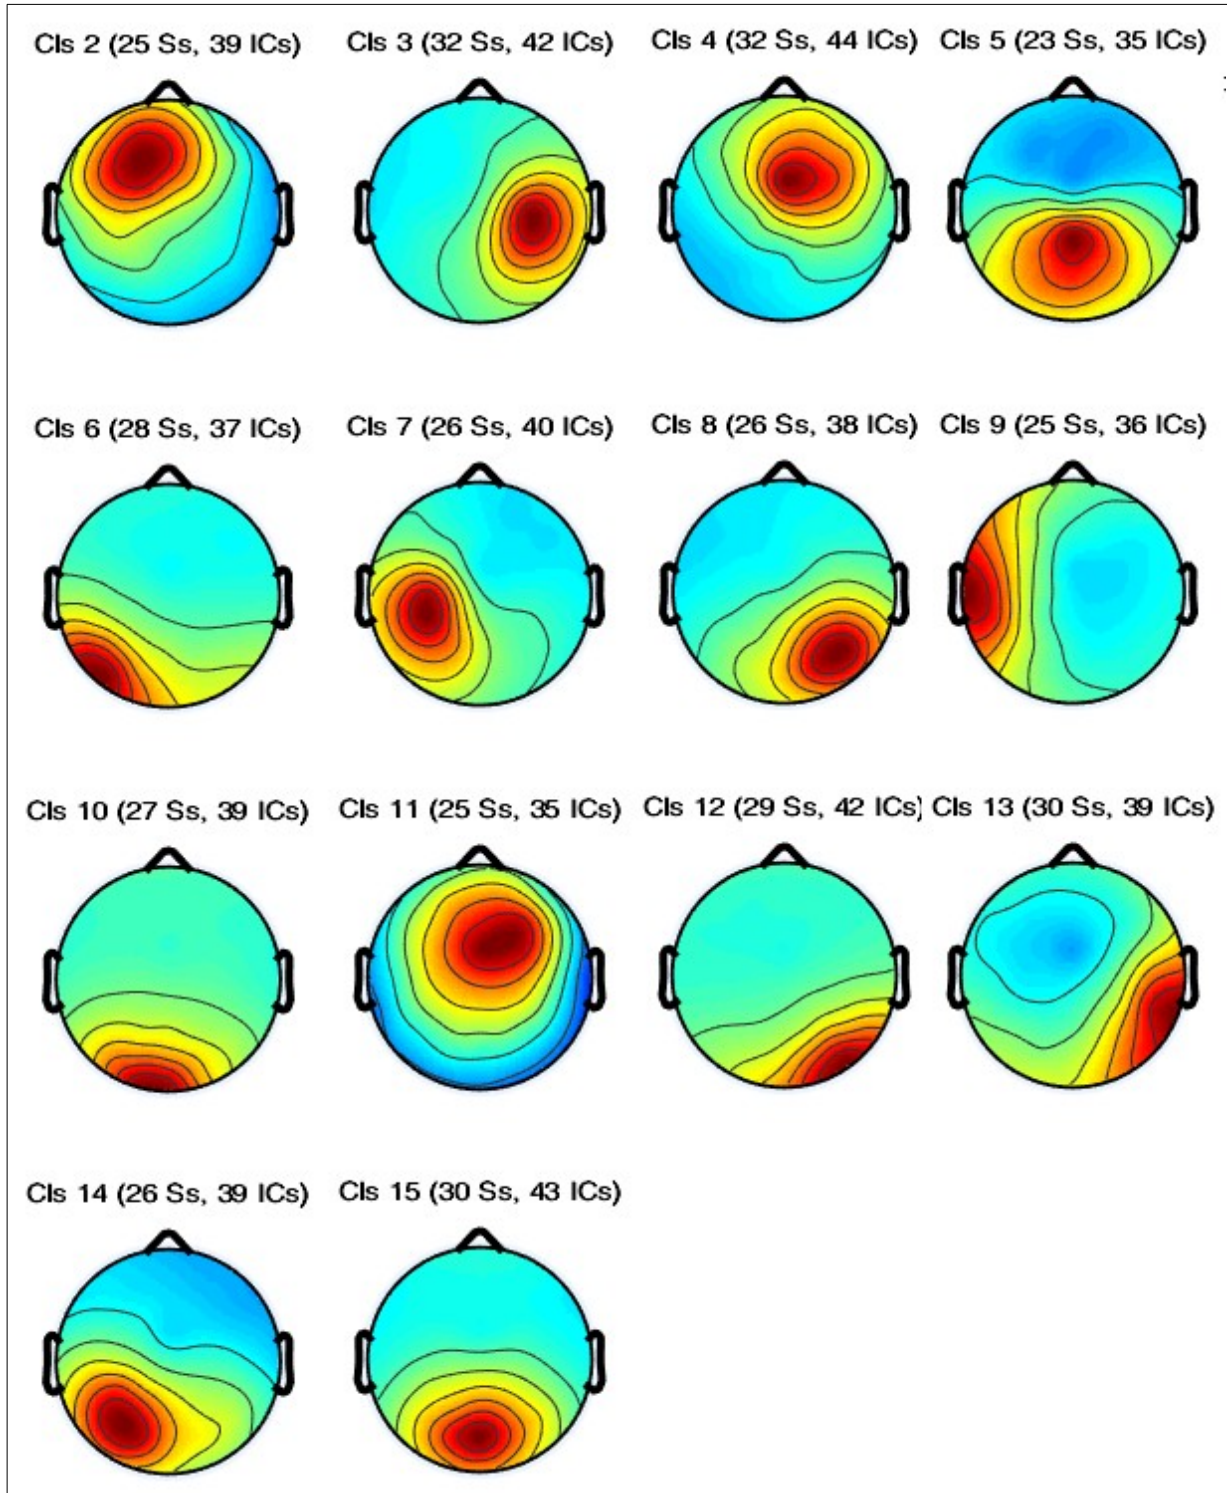

**Supplementary Figure 1.** Average scalp maps for all clusters. Ss – number of subjects; ICs – number of sources.

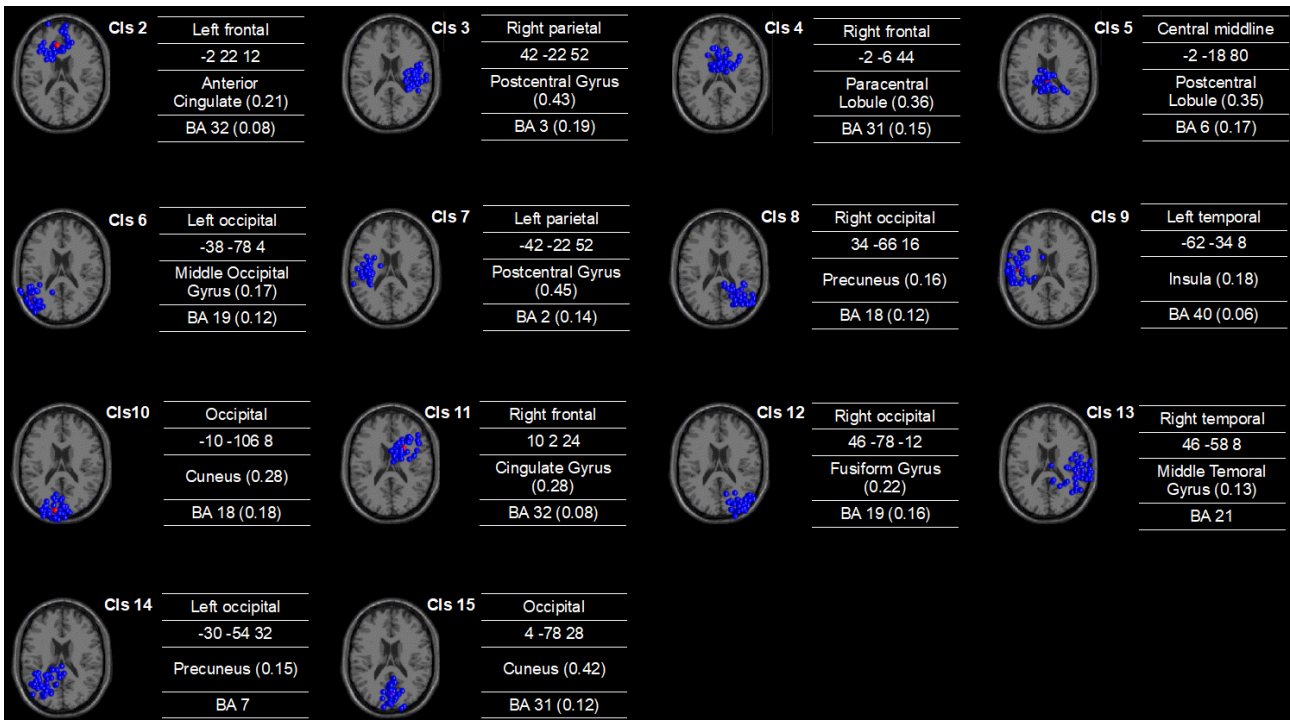

**Supplementary Figure 2.** Estimated dipole locations of ICs (*blue dots*) with MNI coordinates of cluster centroid and the probabilistic position in anatomical and Brodmann areas (*table*).

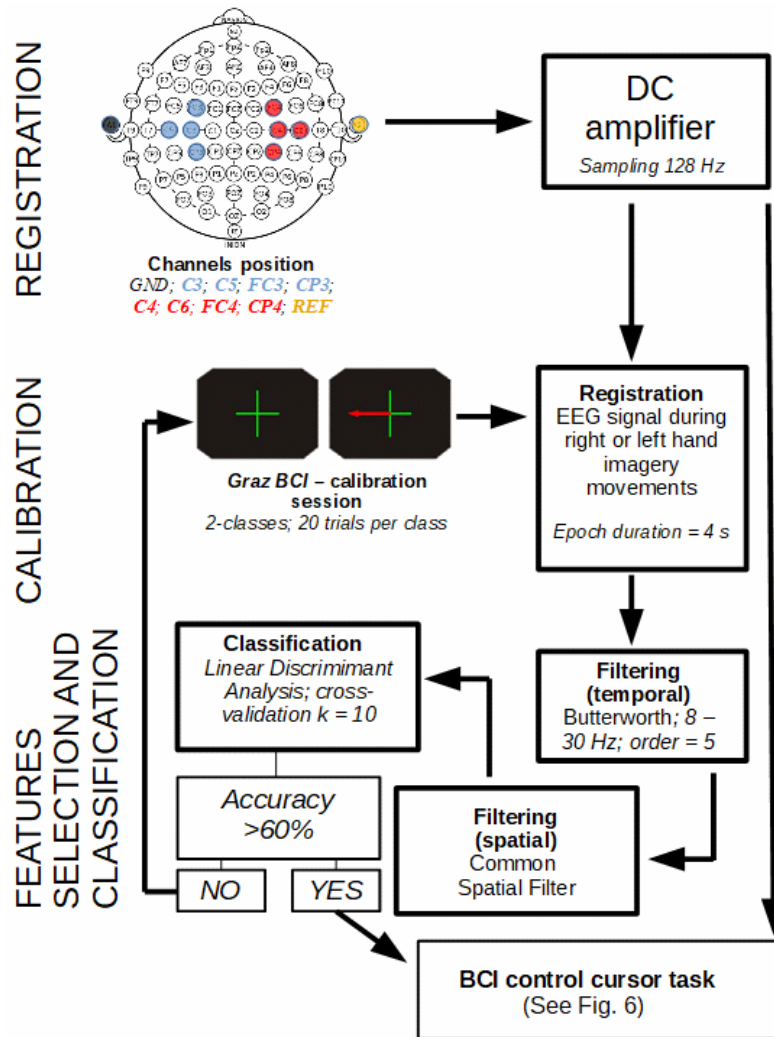

**Supplementary Figure 3.** The scheme of signal processing in the off-line session.
